# Supplementary material for: Systematic Search for Recipes to Generate Induced Pluripotent Stem Cells
Source: PLoS Comput Biol. 2011 Dec 22;7(12):e1002300. doi: 10.1371/journal.pcbi.1002300 (PMC3245295; doi:10.1371/journal.pcbi.1002300)
Supplement: Dataset S2 — Possible reprogramming recipes with overexpression and knockdown. (XLSX) [file pcbi.1002300.s002.xlsx]

## Sheet: iPS 4-Overexpress + 1KD Recipe
Recipes	Reprogramming Efficiency	RMSD	Pearson	Spearman
OCT4_SOX2_KLF4&GATA6	0.570686	0.0444166	0.990064	0.987042
OCT4_SOX2_KLF4&GATA2	0.333176	0.0650437	0.979129	0.984546
OCT4_SOX2_KLF4&cAMP	0.280051	0.0879768	0.956469	0.960185
OCT4_SOX2_KLF4&CSH1	0.212106	0.0592912	0.984542	0.98629
OCT4_SOX2_KLF4&HNF4A	0.211507	0.0956199	0.949971	0.961606
OCT4_SOX2_KLF4&FOXA2	0.211377	0.072891	0.972275	0.98111
OCT4_SOX2_KLF4&LEF1	0.211229	0.0583165	0.985386	0.987092
OCT4_SOX2_KLF4&BMP2K	0.211223	0.0823048	0.963205	0.972323
OCT4_SOX2_KLF4&MAX	0.211159	0.0982742	0.946881	0.952627
OCT4_SOX2_KLF4&SOX17	0.210983	0.0588963	0.984936	0.987074
OCT4_SOX2_KLF4&FOXO1A	0.210981	0.139786	0.886167	0.902118
OCT4_SOX2_KLF4&GATA3	0.210956	0.0552612	0.986854	0.987331
OCT4_SOX2_KLF4&AFP	0.210928	0.07697	0.968612	0.980682
OCT4_SOX2_KLF4&T	0.210898	0.0623488	0.981646	0.98511
OCT4_SOX2_KLF4&CDX2	0.210873	0.0584149	0.985227	0.986461
OCT4_SOX2_KLF4&SALL4	0.210839	0.106339	0.936059	0.948439
OCT4_SOX2_KLF4&bCAT	0.210786	0.127543	0.913903	0.921872
OCT4_SOX2_KLF4&SP1	0.210782	0.107792	0.933942	0.931927
OCT4_SOX2_KLF4&Mad	0.210769	0.0773006	0.968259	0.978203
OCT4_SOX2_KLF4&ZNF206	0.210712	0.13818	0.888643	0.922969
OCT4_SOX2_KLF4&FOXA1	0.21071	0.0847777	0.960883	0.972905
OCT4_SOX2_KLF4&CEBP	0.210563	0.086401	0.95944	0.968182
OCT4_SOX2_KLF4&hCGb	0.210546	0.0775618	0.96805	0.979504
OCT4_SOX2_KLF4&BMP2	0.210358	0.0628879	0.981127	0.9847
OCT4_SOX2_KLF4&SUMO1	0.210354	0.125064	0.908611	0.913872
OCT4_SOX2_KLF4&TCF3	0.210229	0.0917432	0.952633	0.965332
OCT4_SOX2_KLF4&SP3	0.210193	0.0800888	0.965285	0.977007
OCT4_SOX2_KLF4&hCGa	0.210089	0.068568	0.976285	0.983024
OCT4_SOX2_KLF4&NFYA	0.210002	0.114305	0.925977	0.928216
OCT4_SOX2_KLF4&MYC	0.205635	0.0881775	0.957536	0.966227
OCT4_SOX2_KLF4&PIAS1	0.179452	0.115215	0.924302	0.923706
OCT4_SOX2_KLF4&PIASy	0.142769	0.091264	0.953939	0.963741
OCT4_SOX2_KLF4&E2F4	0.134355	0.169475	0.851277	0.831504
OCT4_SOX2_KLF4&FOXD3	0	0.118798	0.922916	0.940388
OCT4_SOX2_KLF4&GATA4	0	0.0671315	0.977586	0.983675
OCT4_SOX2_KLF4&GDF3	0	0.13818	0.888643	0.922765
OCT4_SOX2_KLF4&KLF4	0	0.0582633	0.986903	0.986581
OCT4_SOX2_KLF4&LMCD1	0	0.127734	0.905936	0.925516
OCT4_SOX2_KLF4&NANOG	0	0.348264	0.153293	0.298063
OCT4_SOX2_KLF4&OCT4	0	0.0582633	0.986903	0.98687
OCT4_SOX2_KLF4&PBX1	0	0.159384	0.849652	0.919499
OCT4_SOX2_KLF4&PRDM14	0	0.0556497	0.985976	0.988272
OCT4_SOX2_KLF4&SOX2	0	0.0582633	0.986903	0.986581
OCT4_SOX2_KLF4&TDGF1	0	0.139786	0.886167	0.902402
OCT4_SOX2_KLF4&ZFP42	0	0.139431	0.886707	0.913685
OCT4_SOX2_KLF4&ZIC3	0	0.17904	0.803217	0.883958
KLF4_OCT4_SOX2	0.210998	0.0570288	0.989708	0.989126
OCT4_SOX2_KLF4_PRDM14&GATA6	0.616624	0.0447996	0.989263	0.987023
OCT4_SOX2_KLF4_PRDM14&GATA2	0.564099	0.0627551	0.979259	0.985213
OCT4_SOX2_KLF4_PRDM14&SUMO1	0.4062	0.123876	0.910821	0.915284
OCT4_SOX2_KLF4_PRDM14&cAMP	0.405386	0.0869952	0.957575	0.959314
OCT4_SOX2_KLF4_PRDM14&BMP2K	0.358025	0.0806053	0.964104	0.973973
OCT4_SOX2_KLF4_PRDM14&SP1	0.357913	0.105974	0.936308	0.934708
OCT4_SOX2_KLF4_PRDM14&hCGb	0.357872	0.0756181	0.968577	0.981537
OCT4_SOX2_KLF4_PRDM14&FOXA2	0.35757	0.0708163	0.972803	0.983057
OCT4_SOX2_KLF4_PRDM14&T	0.357368	0.0601605	0.981444	0.987332
OCT4_SOX2_KLF4_PRDM14&SOX17	0.357269	0.0563252	0.984513	0.988256
OCT4_SOX2_KLF4_PRDM14&FOXA1	0.357161	0.0830066	0.961942	0.975245
OCT4_SOX2_KLF4_PRDM14&CSH1	0.357129	0.056731	0.984746	0.988526
OCT4_SOX2_KLF4_PRDM14&CEBP	0.357093	0.0846246	0.960324	0.969447
OCT4_SOX2_KLF4_PRDM14&hCGa	0.357077	0.066369	0.976476	0.984815
OCT4_SOX2_KLF4_PRDM14&AFP	0.357033	0.075011	0.969133	0.98222
OCT4_SOX2_KLF4_PRDM14&MAX	0.357031	0.0963283	0.948947	0.956036
OCT4_SOX2_KLF4_PRDM14&Mad	0.357008	0.0753503	0.968924	0.980403
OCT4_SOX2_KLF4_PRDM14&SP3	0.35693	0.078261	0.965995	0.977536
OCT4_SOX2_KLF4_PRDM14&LEF1	0.356852	0.0556248	0.985054	0.988665
OCT4_SOX2_KLF4_PRDM14&GATA3	0.356827	0.0527788	0.986456	0.988717
OCT4_SOX2_KLF4_PRDM14&HNF4A	0.356814	0.0942005	0.951653	0.964807
OCT4_SOX2_KLF4_PRDM14&TCF3	0.356644	0.0909846	0.952804	0.966476
OCT4_SOX2_KLF4_PRDM14&BMP2	0.356322	0.0605467	0.981045	0.98605
OCT4_SOX2_KLF4_PRDM14&ZNF206	0.356321	0.137202	0.891042	0.923934
OCT4_SOX2_KLF4_PRDM14&NFYA	0.355987	0.112961	0.927691	0.929173
OCT4_SOX2_KLF4_PRDM14&bCAT	0.355961	0.126909	0.916362	0.926686
OCT4_SOX2_KLF4_PRDM14&MYC	0.355945	0.106516	0.937322	0.927326
OCT4_SOX2_KLF4_PRDM14&CDX2	0.35586	0.0558575	0.98479	0.988645
OCT4_SOX2_KLF4_PRDM14&SALL4	0.355744	0.104934	0.937498	0.950109
OCT4_SOX2_KLF4_PRDM14&FOXO1A	0.354377	0.138729	0.888619	0.903392
OCT4_SOX2_KLF4_PRDM14&PIAS1	0.318953	0.113827	0.926807	0.926157
OCT4_SOX2_KLF4_PRDM14&E2F4	0.240008	0.168243	0.856893	0.837975
OCT4_SOX2_KLF4_PRDM14&PIASy	0.236631	0.0895671	0.954806	0.965467
OCT4_SOX2_KLF4_PRDM14&FOXD3	0	0.117515	0.924631	0.940501
OCT4_SOX2_KLF4_PRDM14&GATA4	0	0.0648794	0.977694	0.985691
OCT4_SOX2_KLF4_PRDM14&GDF3	0	0.137202	0.891042	0.924077
OCT4_SOX2_KLF4_PRDM14&KLF4	0	0.0556497	0.985976	0.987964
OCT4_SOX2_KLF4_PRDM14&LMCD1	0	0.125646	0.908246	0.926379
OCT4_SOX2_KLF4_PRDM14&NANOG	0	0.3417	0.22772	0.331903
OCT4_SOX2_KLF4_PRDM14&OCT4	0	0.0556497	0.985976	0.988459
OCT4_SOX2_KLF4_PRDM14&PBX1	0	0.156458	0.855111	0.919634
OCT4_SOX2_KLF4_PRDM14&PRDM14	0	0.0556497	0.985976	0.988611
OCT4_SOX2_KLF4_PRDM14&SOX2	0	0.0556497	0.985976	0.988835
OCT4_SOX2_KLF4_PRDM14&TDGF1	0	0.138729	0.888619	0.903175
OCT4_SOX2_KLF4_PRDM14&ZFP42	0	0.138385	0.889168	0.915406
OCT4_SOX2_KLF4_PRDM14&ZIC3	0	0.175603	0.810791	0.8836
OCT4_SOX2_KLF4_PRDM14	0.356406	0.054187	0.988551	0.989125
OCT4_SOX2_KLF4_MYC&GATA6	0.6278	0.0797392	0.964028	0.96613
OCT4_SOX2_KLF4_MYC&GATA2	0.365946	0.0927973	0.95077	0.961893
OCT4_SOX2_KLF4_MYC&cAMP	0.307654	0.110174	0.930561	0.939713
OCT4_SOX2_KLF4_MYC&SUMO1	0.259252	0.141218	0.883008	0.895726
OCT4_SOX2_KLF4_MYC&FOXA2	0.233562	0.0984568	0.944112	0.960287
OCT4_SOX2_KLF4_MYC&TCF3	0.233373	0.11058	0.928968	0.945893
OCT4_SOX2_KLF4_MYC&GATA3	0.232586	0.0862233	0.958162	0.966031
OCT4_SOX2_KLF4_MYC&NFYA	0.232265	0.131683	0.898495	0.905013
OCT4_SOX2_KLF4_MYC&BMP2	0.232246	0.0912992	0.952646	0.964887
OCT4_SOX2_KLF4_MYC&hCGb	0.232174	0.101958	0.939986	0.958317
OCT4_SOX2_KLF4_MYC&SP3	0.232128	0.104498	0.936842	0.956127
OCT4_SOX2_KLF4_MYC&LEF1	0.232007	0.0881731	0.956362	0.965348
OCT4_SOX2_KLF4_MYC&SP1	0.231993	0.11976	0.91644	0.92556
OCT4_SOX2_KLF4_MYC&SOX17	0.231948	0.088597	0.956056	0.966732
OCT4_SOX2_KLF4_MYC&hCGa	0.23189	0.0953007	0.947987	0.960388
OCT4_SOX2_KLF4_MYC&CSH1	0.231881	0.08886	0.955761	0.963928
OCT4_SOX2_KLF4_MYC&HNF4A	0.231879	0.116292	0.92291	0.940147
OCT4_SOX2_KLF4_MYC&FOXA1	0.23186	0.107554	0.933034	0.952109
OCT4_SOX2_KLF4_MYC&T	0.231825	0.0909287	0.953123	0.963616
OCT4_SOX2_KLF4_MYC&Mad	0.231692	0.101765	0.940145	0.956868
OCT4_SOX2_KLF4_MYC&BMP2K	0.231578	0.105616	0.935496	0.951942
OCT4_SOX2_KLF4_MYC&AFP	0.231546	0.101514	0.940513	0.960488
OCT4_SOX2_KLF4_MYC&CDX2	0.231529	0.0882777	0.956415	0.966107
OCT4_SOX2_KLF4_MYC&MAX	0.231426	0.111801	0.927763	0.943858
OCT4_SOX2_KLF4_MYC&bCAT	0.231241	0.143156	0.886923	0.904085
OCT4_SOX2_KLF4_MYC&CEBP	0.231027	0.108382	0.931835	0.948126
OCT4_SOX2_KLF4_MYC&ZNF206	0.230684	0.153214	0.861463	0.90301
OCT4_SOX2_KLF4_MYC&SALL4	0.230527	0.125254	0.908299	0.927803
OCT4_SOX2_KLF4_MYC&FOXO1A	0.212416	0.154664	0.858408	0.881392
OCT4_SOX2_KLF4_MYC&MYC	0.211858	0.0881775	0.957536	0.966251
OCT4_SOX2_KLF4_MYC&PIAS1	0.197052	0.132642	0.898493	0.900829
OCT4_SOX2_KLF4_MYC&PIASy	0.158109	0.112738	0.926092	0.942438
OCT4_SOX2_KLF4_MYC&E2F4	0.148647	0.181776	0.82647	0.815891
OCT4_SOX2_KLF4_MYC&FOXD3	0	0.135991	0.893007	0.919923
OCT4_SOX2_KLF4_MYC&GATA4	0	0.0942724	0.949233	0.962368
OCT4_SOX2_KLF4_MYC&GDF3	0	0.153214	0.861463	0.90193
OCT4_SOX2_KLF4_MYC&KLF4	0	0.0881775	0.957536	0.965279
OCT4_SOX2_KLF4_MYC&LMCD1	0	0.143847	0.876411	0.904214
OCT4_SOX2_KLF4_MYC&NANOG	0	0.354381	0.144751	0.299388
OCT4_SOX2_KLF4_MYC&OCT4	0	0.0881775	0.957536	0.965412
OCT4_SOX2_KLF4_MYC&PBX1	0	0.172545	0.817359	0.892897
OCT4_SOX2_KLF4_MYC&PRDM14	0	0.0864314	0.958194	0.967509
OCT4_SOX2_KLF4_MYC&SOX2	0	0.0881775	0.957536	0.965022
OCT4_SOX2_KLF4_MYC&TDGF1	0	0.154664	0.858408	0.882195
OCT4_SOX2_KLF4_MYC&ZFP42	0	0.154342	0.859112	0.891892
OCT4_SOX2_KLF4_MYC&ZIC3	0	0.190844	0.769753	0.855541
OCT4_SOX2_KLF4_MYC	0.231418	0.0887787	0.959409	0.969235
OCT4_SOX2_KLF4_MYC_PRDM14&GATA6	0.58648	0.0799152	0.96407	0.968269
OCT4_SOX2_KLF4_MYC_PRDM14&GATA2	0.536262	0.0911685	0.952362	0.964996
OCT4_SOX2_KLF4_MYC_PRDM14&SUMO1	0.387064	0.140155	0.886441	0.898551
OCT4_SOX2_KLF4_MYC_PRDM14&cAMP	0.386103	0.109358	0.932887	0.939072
OCT4_SOX2_KLF4_MYC_PRDM14&bCAT	0.33979	0.142855	0.890369	0.907636
OCT4_SOX2_KLF4_MYC_PRDM14&hCGa	0.339534	0.0936928	0.949638	0.963839
OCT4_SOX2_KLF4_MYC_PRDM14&Mad	0.339479	0.100255	0.94225	0.960824
OCT4_SOX2_KLF4_MYC_PRDM14&SP3	0.339421	0.103037	0.939029	0.95905
OCT4_SOX2_KLF4_MYC_PRDM14&HNF4A	0.339416	0.115097	0.925951	0.944176
OCT4_SOX2_KLF4_MYC_PRDM14&FOXA2	0.339399	0.0968939	0.946083	0.962318
OCT4_SOX2_KLF4_MYC_PRDM14&CDX2	0.339308	0.0865653	0.957487	0.96772
OCT4_SOX2_KLF4_MYC_PRDM14&LEF1	0.339245	0.0864583	0.957472	0.968313
OCT4_SOX2_KLF4_MYC_PRDM14&CSH1	0.339236	0.0871315	0.957199	0.966181
OCT4_SOX2_KLF4_MYC_PRDM14&SP1	0.339219	0.118479	0.919188	0.926397
OCT4_SOX2_KLF4_MYC_PRDM14&FOXA1	0.339186	0.10613	0.935505	0.954052
OCT4_SOX2_KLF4_MYC_PRDM14&GATA3	0.339182	0.0846114	0.959254	0.968836
OCT4_SOX2_KLF4_MYC_PRDM14&AFP	0.338958	0.100001	0.942475	0.961137
OCT4_SOX2_KLF4_MYC_PRDM14&hCGb	0.338826	0.100452	0.941945	0.95965
OCT4_SOX2_KLF4_MYC_PRDM14&NFYA	0.338817	0.130512	0.901613	0.905828
OCT4_SOX2_KLF4_MYC_PRDM14&T	0.338774	0.0894023	0.954371	0.967057
OCT4_SOX2_KLF4_MYC_PRDM14&MAX	0.338754	0.11043	0.930378	0.946306
OCT4_SOX2_KLF4_MYC_PRDM14&TCF3	0.338752	0.109193	0.931299	0.947391
OCT4_SOX2_KLF4_MYC_PRDM14&ZNF206	0.338748	0.152309	0.865239	0.903812
OCT4_SOX2_KLF4_MYC_PRDM14&BMP2K	0.338724	0.104263	0.937806	0.952538
OCT4_SOX2_KLF4_MYC_PRDM14&BMP2	0.338574	0.0896626	0.954037	0.965737
OCT4_SOX2_KLF4_MYC_PRDM14&CEBP	0.338561	0.106961	0.934123	0.950238
OCT4_SOX2_KLF4_MYC_PRDM14&SOX17	0.338363	0.0868679	0.957152	0.968946
OCT4_SOX2_KLF4_MYC_PRDM14&FOXO1A	0.337999	0.153685	0.862313	0.884029
OCT4_SOX2_KLF4_MYC_PRDM14&SALL4	0.329429	0.124035	0.911161	0.931138
OCT4_SOX2_KLF4_MYC_PRDM14&MYC	0.319649	0.0864314	0.958194	0.969943
OCT4_SOX2_KLF4_MYC_PRDM14&PIAS1	0.302666	0.131422	0.902219	0.90723
OCT4_SOX2_KLF4_MYC_PRDM14&E2F4	0.227244	0.180498	0.833403	0.824299
OCT4_SOX2_KLF4_MYC_PRDM14&PIASy	0.225388	0.111336	0.928384	0.94581
OCT4_SOX2_KLF4_MYC_PRDM14&FOXD3	0	0.134845	0.896356	0.922175
OCT4_SOX2_KLF4_MYC_PRDM14&GATA4	0	0.0926436	0.950806	0.965397
OCT4_SOX2_KLF4_MYC_PRDM14&GDF3	0	0.152309	0.865239	0.904275
OCT4_SOX2_KLF4_MYC_PRDM14&KLF4	0	0.0864314	0.958194	0.967527
OCT4_SOX2_KLF4_MYC_PRDM14&LMCD1	0	0.141963	0.880388	0.906088
OCT4_SOX2_KLF4_MYC_PRDM14&NANOG	0	0.347847	0.217559	0.325249
OCT4_SOX2_KLF4_MYC_PRDM14&OCT4	0	0.0864314	0.958194	0.968962
OCT4_SOX2_KLF4_MYC_PRDM14&PBX1	0	0.169811	0.825305	0.892844
OCT4_SOX2_KLF4_MYC_PRDM14&PRDM14	0	0.0864314	0.958194	0.967652
OCT4_SOX2_KLF4_MYC_PRDM14&SOX2	0	0.0864314	0.958194	0.967652
OCT4_SOX2_KLF4_MYC_PRDM14&TDGF1	0	0.153685	0.862313	0.884518
OCT4_SOX2_KLF4_MYC_PRDM14&ZFP42	0	0.153375	0.863003	0.896234
OCT4_SOX2_KLF4_MYC_PRDM14&ZIC3	0	0.187589	0.780209	0.856698
OCT4_SOX2_KLF4_MYC_PRDM14	0.339366	0.086431	0.958194	0.967652
OCT4_SOX2_MYC_PRDM14&GATA6	0.613516	0.0819132	0.961799	0.965877
OCT4_SOX2_MYC_PRDM14&GATA2	0.562931	0.0954054	0.947664	0.962339
OCT4_SOX2_MYC_PRDM14&SUMO1	0.406177	0.142939	0.880139	0.895843
OCT4_SOX2_MYC_PRDM14&cAMP	0.405346	0.111825	0.928574	0.939663
OCT4_SOX2_MYC_PRDM14&GATA3	0.357207	0.0886643	0.955274	0.965603
OCT4_SOX2_MYC_PRDM14&SP1	0.356885	0.12185	0.913592	0.923933
OCT4_SOX2_MYC_PRDM14&hCGa	0.356792	0.0978985	0.9448	0.963005
OCT4_SOX2_MYC_PRDM14&bCAT	0.356642	0.145142	0.884733	0.906023
OCT4_SOX2_MYC_PRDM14&hCGb	0.356637	0.104403	0.936884	0.959501
OCT4_SOX2_MYC_PRDM14&FOXA2	0.356619	0.100992	0.941079	0.959188
OCT4_SOX2_MYC_PRDM14&ZNF206	0.356478	0.154609	0.859307	0.9016
OCT4_SOX2_MYC_PRDM14&HNF4A	0.356473	0.118412	0.920462	0.940643
OCT4_SOX2_MYC_PRDM14&TCF3	0.356357	0.112838	0.926001	0.946935
OCT4_SOX2_MYC_PRDM14&T	0.356327	0.093795	0.949713	0.965535
OCT4_SOX2_MYC_PRDM14&CEBP	0.356318	0.110697	0.928921	0.948075
OCT4_SOX2_MYC_PRDM14&SOX17	0.356275	0.0913784	0.952646	0.964524
OCT4_SOX2_MYC_PRDM14&NFYA	0.356168	0.133603	0.895797	0.903614
OCT4_SOX2_MYC_PRDM14&MYC	0.356093	0.0909932	0.953899	0.965397
OCT4_SOX2_MYC_PRDM14&BMP2	0.35592	0.0939923	0.949394	0.964283
OCT4_SOX2_MYC_PRDM14&CSH1	0.355908	0.0916585	0.952786	0.965788
OCT4_SOX2_MYC_PRDM14&SP3	0.355867	0.106866	0.933827	0.954423
OCT4_SOX2_MYC_PRDM14&Mad	0.355822	0.104214	0.937169	0.957102
OCT4_SOX2_MYC_PRDM14&SALL4	0.35579	0.127242	0.905491	0.927069
OCT4_SOX2_MYC_PRDM14&LEF1	0.355776	0.0909097	0.953058	0.966096
OCT4_SOX2_MYC_PRDM14&AFP	0.355646	0.103969	0.937425	0.959651
OCT4_SOX2_MYC_PRDM14&FOXA1	0.355587	0.109868	0.930223	0.949379
OCT4_SOX2_MYC_PRDM14&FOXO1A	0.355574	0.156259	0.855883	0.881889
OCT4_SOX2_MYC_PRDM14&CDX2	0.35556	0.091009	0.953049	0.965806
OCT4_SOX2_MYC_PRDM14&BMP2K	0.355396	0.107912	0.93273	0.951169
OCT4_SOX2_MYC_PRDM14&MAX	0.355241	0.114035	0.925171	0.94172
OCT4_SOX2_MYC_PRDM14&PIAS1	0.317477	0.134689	0.895646	0.902729
OCT4_SOX2_MYC_PRDM14&E2F4	0.23845	0.183385	0.824868	0.816021
OCT4_SOX2_MYC_PRDM14&PIASy	0.235815	0.115051	0.922865	0.942417
OCT4_SOX2_MYC_PRDM14&FOXD3	0	0.137881	0.890707	0.919597
OCT4_SOX2_MYC_PRDM14&GATA4	0	0.0969058	0.945999	0.962813
OCT4_SOX2_MYC_PRDM14&GDF3	0	0.154609	0.859307	0.902648
OCT4_SOX2_MYC_PRDM14&KLF4	0	0.188644	0.779249	0.859832
OCT4_SOX2_MYC_PRDM14&LMCD1	0	0.146816	0.870977	0.903606
OCT4_SOX2_MYC_PRDM14&NANOG	0	0.350104	0.191459	0.314327
OCT4_SOX2_MYC_PRDM14&OCT4	0	0.0909932	0.953899	0.965806
OCT4_SOX2_MYC_PRDM14&PBX1	0	0.174971	0.812841	0.888613
OCT4_SOX2_MYC_PRDM14&PRDM14	0	0.0909932	0.953899	0.964609
OCT4_SOX2_MYC_PRDM14&SOX2	0	0.0909932	0.953899	0.965788
OCT4_SOX2_MYC_PRDM14&TDGF1	0	0.156259	0.855883	0.88239
OCT4_SOX2_MYC_PRDM14&ZFP42	0	0.155908	0.856645	0.893652
OCT4_SOX2_MYC_PRDM14&ZIC3	0	0.194299	0.761336	0.855057
OCT4_SOX2_MYC_PRDM14	0.357106	0.0917491	0.955817	0.967156
