# Supplementary material for: Systematic Search for Recipes to Generate Induced Pluripotent Stem Cells
Source: PubMed Central journal article supplement (PMC3245295; doi:10.1371/journal.pcbi.1002300), 2011-12-22
Supplement: pcbi.1002300.s003.pdf [file pcbi.1002300.s003.pdf]

## Supplementary Materials: Supplementary Results

**Table S1. Proteins included in the curated genetic network.**

| AFP   | bCAT*  | BMP2       | BMP2K     | cAMP* | CDX2    | CDX4    | CEBP      |
|-------|--------|------------|-----------|-------|---------|---------|-----------|
| CSH1  | E2F4   | FOXA1      | FOXA2     | FOXD3 | FOXO1A  | GATA2   | GATA3     |
| GATA4 | GATA6  | GDF3       | hCGa*     | hCGb* | KLF4    | LEF1    | LEF1-bCat |
| LMCD1 | Mad    | Mad-Max    | MAX       | MYC   | Myc-Max | MYC-SP1 | NANOG     |
| NFYA  | OCT4   | Oct4-FOXD3 | Oct4-Sox2 | PBX1  | PIAS1   | PIASy   | PRDM14    |
| SALL4 | SOX17  | SOX2       | SP1       | SP3   | SUMO1   | T       | TCF3      |
| TDGF1 | ZFP42* | ZIC3       | ZNF206*   |       |         |         |           |

\*bCAT= Beta-catenin; CTNNB1; cAMP=cyclic-AMP; hCGa=CGA; hCGb=CGB; ZFP42=REX1; ZNF206=ZSCAN10;

**Table S2. Edges and supporting evidence in the curated genetic network (Edge Number: 124; Activation: 85; Repression: 39)**

| Parent Node | Child Node | Interaction Type<br>(1=activation;<br>0=repression) | References                             |
|-------------|------------|-----------------------------------------------------|----------------------------------------|
| FOXA1       | AFP        | 1                                                   | (1, 2)                                 |
| FOXA2       | AFP        | 1                                                   | (3)                                    |
| SOX2        | BMP2       | 0                                                   | (4),(5),(6)                            |
| NANOG       | BMP2       | 0                                                   | (7),(8)                                |
| BMP2K       | BMP2       | 1                                                   | (9)                                    |
| HNF4A       | BMP2K      | 1                                                   | (10)                                   |
| OCT4        | CDX2       | 0                                                   | (7),(11)                               |
| NANOG       | CDX2       | 0                                                   | (7),(12)                               |
| CDX2        | CDX2       | 1                                                   | 11, 67                                 |
| SP1         | CEBP       | 0                                                   | (13),(14)                              |
| E2F4        | CEBP       | 0                                                   | (7),(15),(16)                          |
| PRDM14      | CSH1       | 0                                                   | (17)                                   |
| FOXD3       | FOXA1      | 1                                                   | (18)                                   |
| OCT4-FOXD3  | FOXA1      | 0                                                   | (18),(19)                              |
| FOXA1       | FOXA1      | 1                                                   | (18)                                   |
| FOXD3       | FOXA2      | 1                                                   | (18)                                   |
| OCT4-FOXD3  | FOXA2      | 0                                                   | (18),(19)                              |
| FOXA2       | FOXA2      | 1                                                   | (18)                                   |
| SOX17       | FOXA2      | 1                                                   | (20),(21),(22),(23),(24),(18),(25),(3) |
| NANOG       | FOXD3      | 1                                                   | (7),(26)                               |
| OCT4        | FOXD3      | 1                                                   | (18),(27),(7)                          |
| SOX2        | FOXD3      | 1                                                   | (7),(26)                               |
| E2F4        | FOXD3      | 1                                                   | (7),(28),(29)                          |
| OCT4        | FOXO1A     | 1                                                   | (7),(26)                               |
| SOX2        | FOXO1A     | 1                                                   | (7),(26)                               |
| NANOG       | FOXO1A     | 1                                                   | (7),(26)                               |

|                  |           |   |                          |
|------------------|-----------|---|--------------------------|
| <b>SUMO1</b>     | GATA2     | 0 | (30)                     |
| <b>PIASy</b>     | GATA2     | 0 | (30)                     |
| <b>SOX2</b>      | GATA2     | 0 | (31)                     |
| <b>NANOG</b>     | GATA2     | 0 | (31)                     |
| <b>NANOG</b>     | GATA3     | 0 | (7),(32)                 |
| <b>OCT4</b>      | GATA4     | 0 | (7),(11),(33)            |
| <b>SUMO1</b>     | GATA4     | 1 | (34)                     |
| <b>PIAS1</b>     | GATA4     | 1 | (34)                     |
| <b>NANOG</b>     | GATA4     | 0 | (7),(11),(33)            |
| <b>PRDM14</b>    | GATA6     | 0 | (17)                     |
| <b>NANOG</b>     | GATA6     | 0 | (7),(35),(12),(36)       |
| <b>OCT4</b>      | GATA6     | 0 | (7),(27)                 |
| <b>GATA4</b>     | GATA6     | 0 | (37)                     |
| <b>LMCD1</b>     | GATA6     | 0 | (38)                     |
| <b>GATA6</b>     | GATA6     | 1 | (39-42)                  |
| <b>NANOG</b>     | GDF3      | 1 | (7),(43)                 |
| <b>OCT4</b>      | hCGa      | 0 | (32),(44),(33),(45),(46) |
| <b>GATA2</b>     | hCGa      | 1 | (47)                     |
| <b>GATA3</b>     | hCGa      | 1 | (47)                     |
| <b>cAMP</b>      | hCGa      | 1 | (48),(49),(50)           |
| <b>OCT4</b>      | hCGb      | 0 | (32),(44),(33),(45),(46) |
| <b>SP1</b>       | hCGb      | 1 | (51)                     |
| <b>cAMP</b>      | hCGb      | 1 | (48),(49),(50)           |
| <b>SP3</b>       | hCGb      | 1 | (52),(53)                |
| <b>GATA6</b>     | HNF4A     | 1 | (54, 55)                 |
| <b>bCAT</b>      | HNF4A     | 1 | (56)                     |
| <b>OCT4</b>      | KLF4      | 1 | (7),(57)                 |
| <b>SOX2</b>      | KLF4      | 1 | (7),(57)                 |
| <b>NANOG</b>     | KLF4      | 1 | (7),(57)                 |
| <b>NANOG</b>     | LEF1      | 0 | (7),(58)                 |
| <b>OCT4</b>      | LEF1      | 0 | (7),(57)                 |
| <b>LEF1</b>      | LEF1-bCat | 1 | (59)                     |
| <b>bCAT</b>      | LEF1-bCat | 1 | (59)                     |
| <b>NANOG</b>     | LMCD1     | 1 | (7),(58)                 |
| <b>cAMP</b>      | LMCD1     | 0 | (60)                     |
| <b>MAX</b>       | Mad-Max   | 1 | (61, 62)                 |
| <b>Mad</b>       | Mad-Max   | 1 | (61, 62)                 |
| <b>PRDM14</b>    | MYC       | 1 | (63)                     |
| <b>E2F4</b>      | MYC       | 1 | (7),(15),(16)            |
| <b>LEF1-bCat</b> | MYC       | 1 | (64)                     |
| <b>TCF3</b>      | MYC       | 0 | (65, 66)                 |
| <b>MYC</b>       | Myc-Max   | 1 | (67)                     |
| <b>MAX</b>       | Myc-Max   | 1 | (67)                     |

|                  |                |   |               |
|------------------|----------------|---|---------------|
| <b>MYC</b>       | MYC-SP1        | 1 | (68)          |
| <b>SP1</b>       | MYC-SP1        | 1 | (68)          |
| <b>ZIC3</b>      | NANOG          | 1 | (69)          |
| <b>NANOG</b>     | NANOG          | 1 | (7)           |
| <b>Oct4-Sox2</b> | NANOG          | 1 | (7)           |
| <b>PBX1</b>      | NANOG          | 1 | (70)          |
| <b>KLF4</b>      | NANOG          | 1 | (70)          |
| <b>GATA6</b>     | NANOG          | 0 | (39-42)       |
| <b>SOX2</b>      | NFYA           | 1 | (7),(71)      |
| <b>E2F4</b>      | NFYA           | 1 | (7),(15),(16) |
| <b>NANOG</b>     | OCT4           | 1 | (7)           |
| <b>Oct4-Sox2</b> | OCT4           | 1 | (7)           |
| <b>CDX2</b>      | OCT4           | 0 | (11, 72)      |
| <b>OCT4</b>      | OCT4-<br>FOXD3 | 1 | (18)          |
| <b>FOXD3</b>     | OCT4-<br>FOXD3 | 1 | (18)          |
| <b>OCT4</b>      | Oct4-Sox2      | 1 | (7)           |
| <b>SOX2</b>      | Oct4-Sox2      | 1 | (7)           |
| <b>NANOG</b>     | PBX1           | 1 | (7),(70)      |
| <b>PIAS1</b>     | PIAS1          | 1 | (73)          |
| <b>E2F4</b>      | PIAS1          | 1 | (7),(74)      |
| <b>PIAS1</b>     | PIASy          | 1 | (73)          |
| <b>OCT4</b>      | PRDM14         | 1 | (7, 75),(57)  |
| <b>SOX2</b>      | PRDM14         | 1 | (7, 75),(57)  |
| <b>NANOG</b>     | PRDM14         | 1 | (7, 75),(57)  |
| <b>LEF1</b>      | SALL4          | 1 | (76)          |
| <b>NANOG</b>     | SALL4          | 1 | (77),(26)     |
| <b>SOX2</b>      | SALL4          | 1 | (77),(26)     |
| <b>ZIC3</b>      | SOX17          | 0 | (69)          |
| <b>OCT4</b>      | SOX17          | 0 | 4,(78, 79)    |
| <b>NANOG</b>     | SOX2           | 1 | 4             |
| <b>Oct4-Sox2</b> | SOX2           | 1 | 4             |
| <b>E2F4</b>      | SP1            | 1 | 4,(80)        |
| <b>SP1</b>       | SP1            | 1 | (80)          |
| <b>SP3</b>       | SP1            | 0 | (80)          |
| <b>CEBP</b>      | SP1            | 1 | (80)          |
| <b>NFYA</b>      | SP1            | 1 | (80)          |
| <b>MYC-SP1</b>   | SP1            | 0 | (68)          |
| <b>SUMO1</b>     | SP3            | 0 | (81, 82)      |
| <b>PIAS1</b>     | SP3            | 0 | (81, 82)      |
| <b>NANOG</b>     | SUMO1          | 1 | 4             |
| <b>E2F4</b>      | SUMO1          | 1 | 4,(83),(28)   |

|               |        |   |            |
|---------------|--------|---|------------|
| <b>NANOG</b>  | T      | 0 | 4,(12, 84) |
| <b>PRDM14</b> | T      | 0 | (17)       |
| <b>E2F4</b>   | T      | 0 | 4,(74)     |
| <b>OCT4</b>   | T      | 0 | 4,(11)     |
| <b>E2F4</b>   | TCF3   | 1 | 4          |
| <b>OCT4</b>   | TDGF1  | 1 | (11)       |
| <b>NANOG</b>  | TDGF1  | 1 | 4,(17)     |
| <b>SOX2</b>   | TDGF1  | 1 | 4,(57)     |
| <b>NANOG</b>  | ZFP42  | 1 | (7, 85)    |
| <b>OCT4</b>   | ZFP42  | 1 | (7, 11)    |
| <b>SOX2</b>   | ZIC3   | 1 | 4,(26)     |
| <b>NANOG</b>  | ZIC3   | 1 | (7, 69)    |
| <b>NANOG</b>  | ZNF206 | 1 | 4,(57)     |

**Table S3. 22 Marker genes for hESCs and differentiated cells.**

|                                |                                                                          |
|--------------------------------|--------------------------------------------------------------------------|
| <b>Pluripotency Markers</b>    | <b>OCT4, SOX2,NANOG,Oct4-Sox2,KLF4,FOXD3,ZIC3,ZFP42,GDF3, TDGF1,PBX1</b> |
| <b>Differentiation Markers</b> | FOXA2, AFP, SOX17, GATA4, GATA6, T, GATA2, GATA3, hCGa*, hCGb*, CDX2     |

\*hCGa=CGA; hCGb=CGB

**Figure S1a-f. Pearson correlation coefficient (r) and p-value (p) between predicted and experimental gene expression changes (in log<sub>2</sub>).** (a)-(c): Day 3, 5 and 7 after knocking down OCT4 by Won et al.(77); (d)-(e) Day 2 and 3 after knocking down OCT4 by Kunarso et al.(86); (f) Day 4 after knocking down NANOG by Hyslop et al.(12).

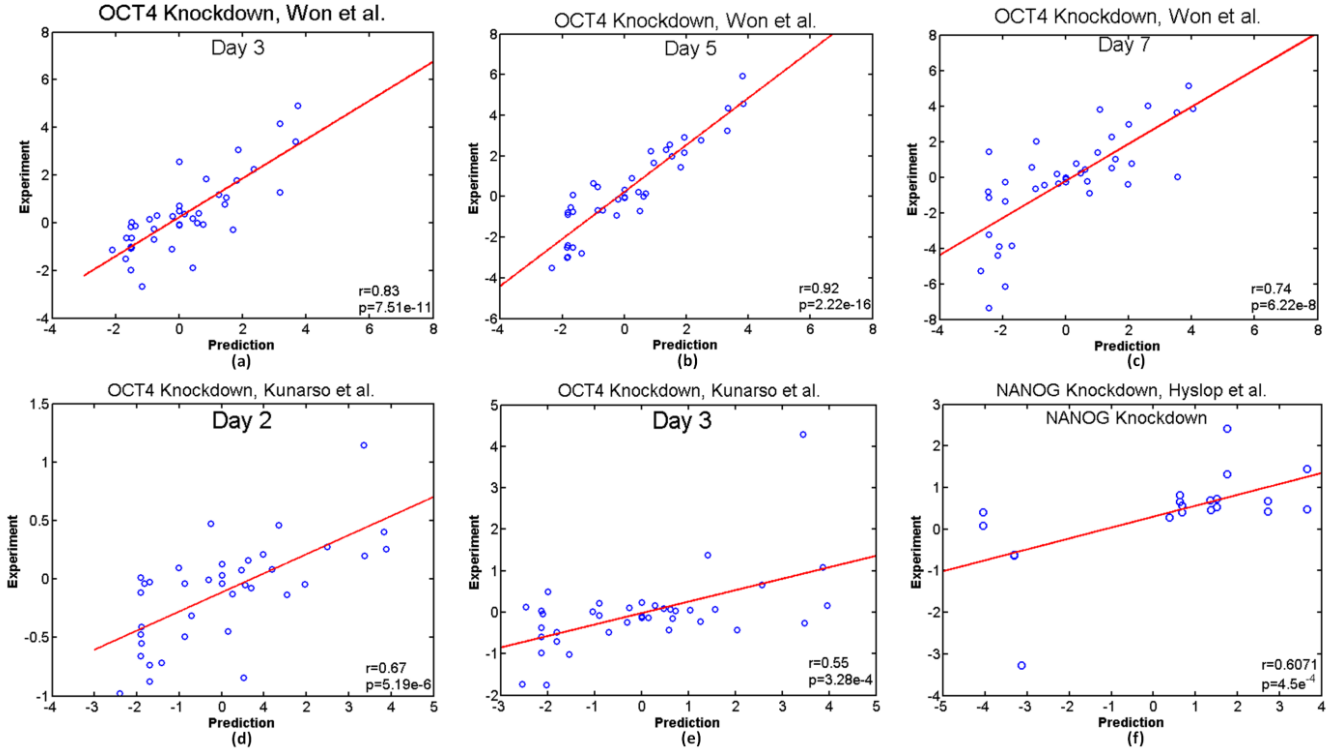

**Figure S2. Reprogramming efficiency and gene expression similarity.** The gene expression similarity is represented by RMSD, Pearson correlation, and Spearman rank correlation.

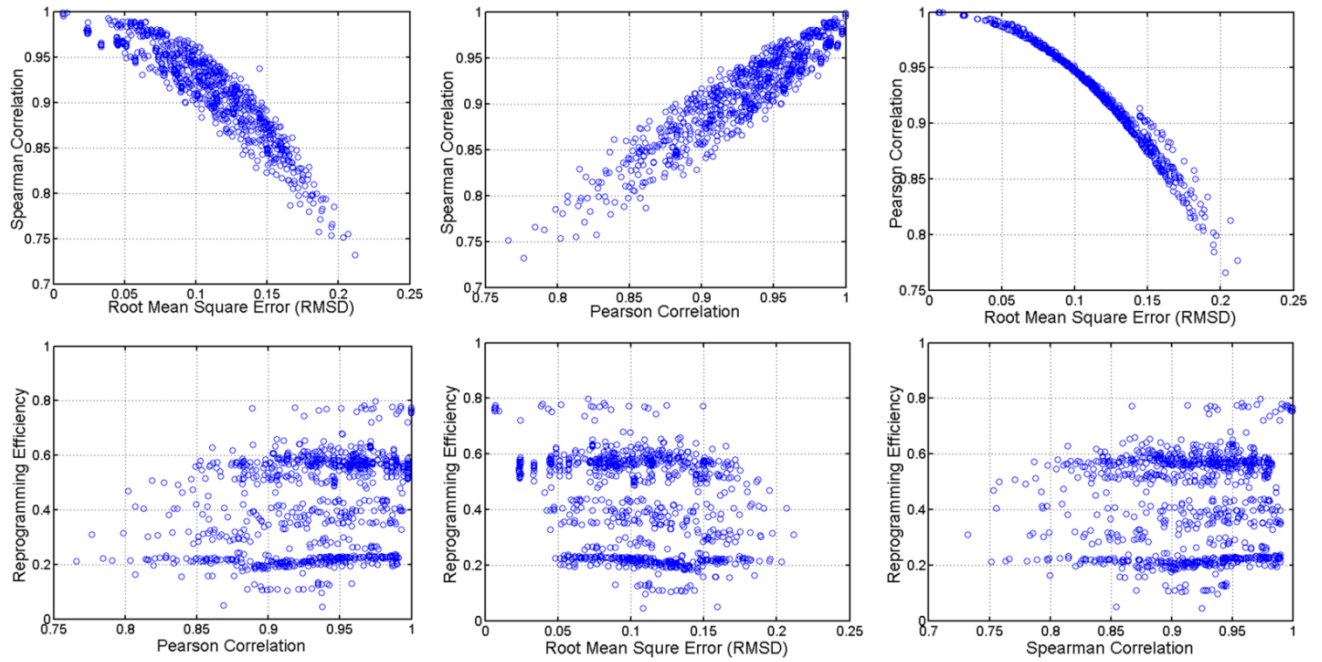

**Figure S3. Distribution of Reprogramming Recipe's RMSD, Pearson and Spearman correlation.**

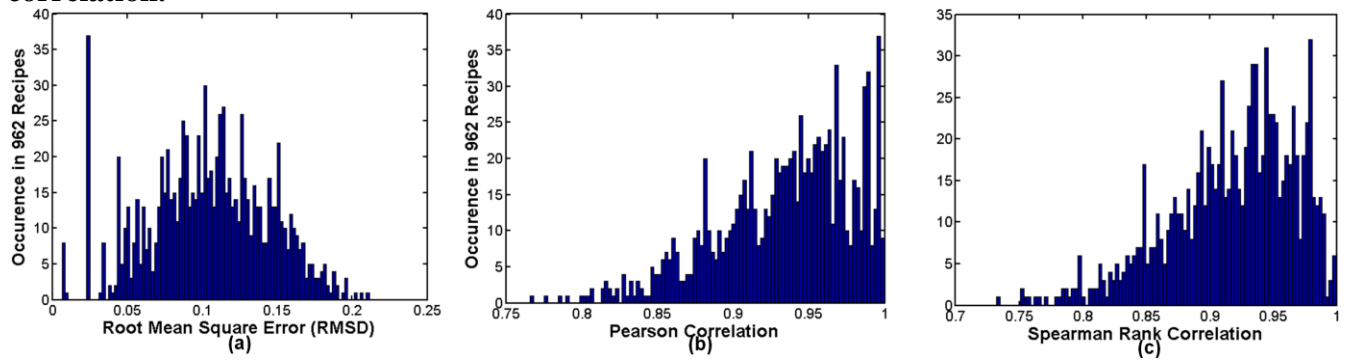

**Figure S4. Reprogramming efficiencies of experimental recipes plus single gene knockdown.** The experimental recipes are shown at the right end. The additional knockdown genes are shown in the order of reprogramming efficiency. If a component of a recipe is also knocked down, knockdown overwrites overexpression in the simulation.

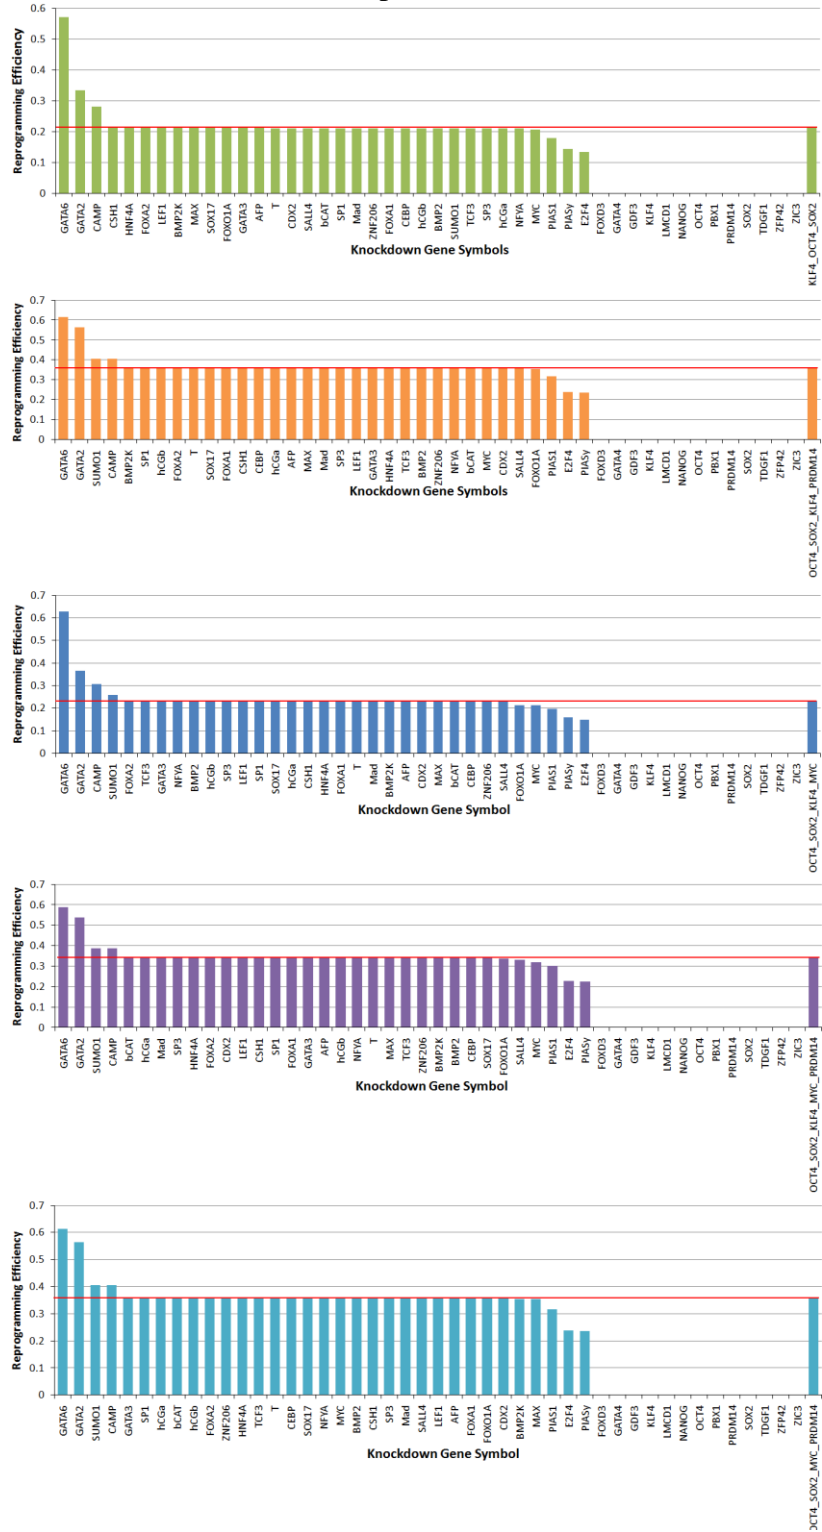



## References:

1. Alison J. Crowe LS, Kelly Ke Li, Kathleen C. Lee, Brett T. Spear and Michelle C. Barton (1999) *The Journal of Biological Chemistry* **274**.
2. Kathleen C. Lee AJC, and Michelle Craig Barton (1999) *Molecular Cell Biology* **19**, 1279-1288.
3. Peterson R, Clevidence D, Ye H, & Costa R (1997) *Cell Growth Differ* **8**, 69-82.
4. Dhara SK & Stice SL (2008) *Journal of Cellular Biochemistry* **105**, 633-640.
5. Chew J-L, Loh Y-H, Zhang W, Chen X, Tam W-L, Yeap L-S, Li P, Ang Y-S, Lim B, Robson P, *et al.* (2005) *Mol. Cell. Biol.* **25**, 6031-6046.
6. Bajpai R, Coppola G, Kaul M, Talantova M, Cimadamore F, Nilbratt M, Geschwind DH, Lipton SA, & Tersikh AV (2009) *Cell Death Differ* **16**, 807-825.
7. Boyer LA, Lee TI, Cole MF, Johnstone SE, Levine SS, Zucker JP, Guenther MG, Kumar RM, Murray HL, Jenner RG, *et al.* (2005) *Cell* **122**, 947-956.
8. Darr H, Mayshar Y, & Benvenisty N (2006) *Development* **133**, 1193-1201.
9. EntrezGene.
10. D'Alessandro A, Righetti PG, & Zolla L (2009) *Journal of Proteome Research* **9**, 144-163.
11. Yasmin Babaie RH, Boris Greber, Thore C. Brink, Wasco Wruck, Detlef Groth, Hans Lehrach, Tom Burdon, James Adjaye (2007) *Stem Cells* **25**, 500-510.
12. Hyslop L, Stojkovic M, Armstrong L, Walter T, Stojkovic P, Przyborski S, Herbert M, Murdoch A, Strachan T, & Lako M (2005) *Stem Cells* **23**, 1035-1043.
13. Timchenko N, Wilson D, Taylor L, Abdelsayed S, Wilde M, Sawadogo M, & Darlington G (1995) *Mol. Cell. Biol.* **15**, 1192-1202.
14. Qi-Qun Tang M-SJ, and M. Daniel Lane (1999) *Molecular and Cellular Biology* **19**, 4855-4865.
15. Paul R. van Ginkel K-MH, Hilde Schjerven and Peggy J. Farnham *The Journal of Biological Chemistry* **272**, 18367-18374.
16. Weinmann AS, Bartley SM, Zhang T, Zhang MQ, & Farnham PJ (2001) *Mol. Cell. Biol.* **21**, 6820-6832.
17. Tsuneyoshi N, Sumi T, Onda H, Nojima H, Nakatsuji N, & Suemori H (2008) *Biochemical and Biophysical Research Communications* **367**, 899-905.
18. Guo Y, Costa R, Ramsey H, Starnes T, Vance G, Robertson K, Kelley M, Reinbold R, Scholer H, & Hromas R (2002) *Proceedings of the National Academy of Sciences of the United States of America* **99**, 3663-3667.
19. Rodriguez RT, Velkey JM, Lutzko C, Seerke R, Kohn DB, O'Shea KS, & Firpo MT (2007) *Exp. Biol. Med.* **232**, 1368-1380.
20. D'Amour KA, Agulnick AD, Eliazer S, Kelly OG, Kroon E, & Baetge EE (2005) *Nat Biotech* **23**, 1534-1541.
21. Yao S, Chen S, Clark J, Hao E, Beattie GM, Hayek A, & Ding S (2006) *Proceedings of the National Academy of Sciences* **103**, 6907-6912.
22. Sinner D, Rankin S, Lee M, & Zorn AM (2004) *Development* **131**, 3069-3080.
23. Palasingam P, Jauch R, Ng CKL, & Kolatkar PR (2009) *Journal of Molecular Biology* **388**, 619-630.
24. Odom DT, Dowell RD, Jacobsen ES, Nekludova L, Rolfe PA, Danford TW, Gifford DK, Fraenkel E, Bell GI, & Young RA (2006) *Mol Syst Biol* **2**.
25. Pani L, Quian XB, Clevidence D, & Costa RH (1992) *Mol. Cell. Biol.* **12**, 552-562.
26. Fong H, Hohenstein KA, & Donovan PJ (2008) *Stem Cells* **26**, 1931-1938.
27. Lukas Chavez ASB, Martin Vingron, Hans Lehrach, James Adjaye, Ralf Herwig (2009) *BMC Genomics* **10**.
28. Weinmann AS, Yan PS, Oberley MJ, Huang TH-M, & Farnham PJ (2002) *Genes & Development* **16**, 235-244.
29. Alkhateeb A, Fain PR, & Spritz RA (2005) *J Invest Dermatol* **125**, 388-391.

30. Chun T-H, Itoh H, Subramanian L, Iniguez-Lluhi JA, & Nakao K (2003) *Circ Res* **92**, 1201-1208.
31. Shi-Jiang Lu JAH, Qiang Feng, Jason D Hipp, Robert Lanza and Anthony Atala (2007) *Genome Biology* **8**.
32. Schulz LC, Ezashi T, Das P, Westfall SD, Livingston KA, & Roberts RM (2008) *Placenta* **29**, 10-16.
33. Hay DC, Sutherland L, Clark J, & Burdon T (2004) *Stem Cells* **22**, 225-235.
34. Jun Wang X-hFaRJS (2004) *The Journal of Biological Chemistry* **279**, 49091-49098.
35. Yasuda S-y, Tsuneyoshi N, Sumi T, Hasegawa K, Tada T, Nakatsuji N, & Suemori H (2006) *Genes to Cells* **11**, 1115-1123.
36. Singh AM, Hamazaki T, Hankowski KE, & Terada N (2007) *Stem Cells* **25**, 2534-2542.
37. Charron F, Paradis P, Bronchain O, Nemer G, & Nemer M (1999) *Mol. Cell. Biol.* **19**, 4355-4365.
38. Rath N, Wang Z, Lu MM, & Morrissey EE (2005) *Mol. Cell. Biol.* **25**, 8864-8873.
39. Rossant J & Tam PPL (2009) *Development* **136**, 701-713.
40. Spruce T, Pernaute B, Di-Gregorio A, Cobb BS, Merckenschlager M, Manzanares M, & Rodriguez TA (2010) *Developmental cell* **19**, 207-219.
41. Chazaud C, Yamanaka Y, Pawson T, & Rossant J (2006) *Developmental cell* **10**, 615-624.
42. Niwa H (2007) *Development* **134**, 635-646.
43. Clark AT, Rodriguez RT, Bodnar MS, Abeyta MJ, Cedars MI, Turek PJ, Firpo MT, & Reijo Pera RA (2004) *Stem Cells* **22**, 169-179.
44. Matin MM, Walsh JR, Gokhale PJ, Draper JS, Bahrami AR, Morton I, Moore HD, & Andrews PW (2004) *Stem Cells* **22**, 659-668.
45. Liu L, Leaman D, Villalta M, & Roberts RM (1997) *Mol Endocrinol* **11**, 1651-1658.
46. Roberts LLARM (1996) *The Journal of Biological Chemistry* **271**, 16683-16689.
47. Steger DJ, Hecht JH, & Mellon PL (1994) *Mol. Cell. Biol.* **14**, 5592-5602.
48. Wade Johnson CA, Stuart Handwerker, Trevor Williams, Richard G. Pestell, J. Larry Jameson (1997) *The Journal of Biological Chemistry* **272**, 15405-15412.
49. JAMESON JL & HOLLENBERG AN (1993) *Endocr Rev* **14**, 203-221.
50. Ringler GE, Lee-Chuan K, Miller WL, & Strauss Iii JF (1989) *Molecular and Cellular Endocrinology* **61**, 13-21.
51. Jameson WJaJL (1999) *Molecular Endocrinology* **13**, 1963-1975.
52. Rull K & Laan M (2005) *Human Reproduction* **20**, 3360-3368.
53. Knofler M, Saleh L, Bauer S, Galos B, Rotheneder H, Husslein P, & Helmer H (2004) *Endocrinology* **145**, 1685-1694.
54. Morrissey EE, Tang Z, Sigrist K, Lu MM, Jiang F, Ip HS, & Parmacek MS (1998) *Genes & Development* **12**, 3579-3590.
55. Shureiqi I, Zuo X, Broaddus R, Wu Y, Guan B, Morris JS, & Lippman SM (2007) *The FASEB Journal* **21**, 743-753.
56. Monga GZaSS (2009) *The FASEB Journal* **23**.
57. Greber B, Lehrach H, & Adjaye J (2007) *BMC Developmental Biology* **7**, 46.
58. Sperger JM, Chen X, Draper JS, Antosiewicz JE, Chon CH, Jones SB, Brooks JD, Andrews PW, Brown PO, & Thomson JA (2003) *Proceedings of the National Academy of Sciences of the United States of America* **100**, 13350-13355.
59. Behrens J, von Kries JP, Kuhl M, Bruhn L, Wedlich D, Grosschedl R, & Birchmeier W (1996) *Nature* **382**, 638-642.
60. Peter Dudek DP (2008) *PLoS ONE* **26**.
61. Ayer DE, Kretzner L, & Eisenman RN (1993) *Cell* **72**, 211-222.
62. Zervos AS, Gyuris J, & Brent R (1993) *Cell* **72**, 223-232.
63. Nishikawa N, Toyota M, Suzuki H, Honma T, Fujikane T, Ohmura T, Nishidate T, Ohe-Toyota M, Maruyama R, Sonoda T, et al. (2007) *Cancer Research* **67**, 9649-9657.

64. Sebastien Taurin NS, Yimin Qin, Darren Browning and Nickolai O. Dulin (2006) *The Journal of Biological Chemistry* **281**, 9971-9976.
65. Cole MF, Johnstone SE, Newman JJ, Kagey MH, & Young RA (2008) *Genes & Development* **22**, 746-755.
66. Spieker N, Peterson J, Reneman S, & Destrée O (2004) *Developmental Dynamics* **231**, 510-517.
67. Blackwood EM, Lüscher B, Kretzner L, & Eisenman RN (1991) *Cold Spring Harbor Symposia on Quantitative Biology* **56**, 109-117.
68. Gartel AL & Shchors K (2003) *Experimental Cell Research* **283**, 17-21.
69. Lim LS, Loh Y-H, Zhang W, Li Y, Chen X, Wang Y, Bakre M, Ng H-H, & Stanton LW (2007) *Mol. Biol. Cell* **18**, 1348-1358.
70. Chan KK-K, Zhang J, Chia N-Y, Chan Y-S, Sim HS, Tan KS, Oh SK-W, Ng H-H, & Choo AB-H (2009) *Stem Cells* **27**, 2114-2125.
71. Marica Grskovic CC, Alexandre Gaspar-Maia, Hao Li, and Miguel Ramalho-Santos (2007) *PLoS Genetics* **3**.
72. Niwa H, Toyooka Y, Shimosato D, Strumpf D, Takahashi K, Yagi R, & Rossant J (2005) *Cell* **123**, 917-929.
73. Jiann-An Tan SHH, Katherine G. Hamil, Gail Grossman, Peter Petrusz and Frank S. French (2002) *The Journal of Biological Chemistry* **277**, 16993-17001.
74. Becker KA, Stein JL, Lian JB, van Wijnen AJ, & Stein GS (2007) *Journal of Cellular Physiology* **210**, 517-526.
75. Dettman EJ & Justice MJ (2008) *PLoS ONE* **3**, e3823.
76. Böhm J, Sustmann C, Wilhelm C, & Kohlhasse J (2006) *Biochemical and Biophysical Research Communications* **348**, 898-907.
77. Won KJea (2010) *Submitted*.
78. Stefanovic S, Abboud N, Désilets S, Nury D, Cowan C, & Pucéat M (2009) *The Journal of Cell Biology* **186**, 665-673.
79. Desbordes SC, Placantonakis DG, Ciro A, Socci ND, Lee G, Djaballah H, & Studer L (2008) *Cell stem cell* **2**, 602-612.
80. Marta Nicolás VN, and Carlos J Ciudad (2003) *Biochemical Journal* **408**.
81. Alexandra Sapetschnig FK, Grigore Rischitor, Trientje Mennenga and Guntram Suske (2004) *The Journal of Biological Chemistry* **279**, 42095-42105.
82. Sapetschnig A, Rischitor G, Braun H, Doll A, Schergaut M, Melchior F, & Suske G (2002) *EMBO J* **21**, 5206-5215.
83. Nanos-Webb A, Deyrieux A, Bian X-I, Rosas-Acosta G, & Wilson V (2010) *Molecular Biology Reports* **37**, 1155-1163.
84. Pankratz MT, Li X-J, LaVaute TM, Lyons EA, Chen X, & Zhang S-C (2007) *Stem Cells* **25**, 1511-1520.
85. Initiative TISC (2007) *Nat Biotech* **25**, 803-816.
86. Kunarso G, Chia N-Y, Jeyakani J, Hwang C, Lu X, Chan Y-S, Ng H-H, & Bourque G (2010) *Nat Genet* **42**, 631-634.
