# Supplementary material for: Systematic Search for Recipes to Generate Induced Pluripotent Stem Cells
Source: PLOS journal article supplement (doi:10.1371/journal.pcbi.1002300), 2011-12-22
Supplement: S4 (10.1371/journal.pcbi.1002300.s004) [file journal.pcbi.1002300.s004]

301 Moved Permanently

# Moved Permanently

The document has moved here.

---

Apache Server at www.ploscompbiol.org Port 80
